# Supplementary material
Source: PubMed Central journal article supplement (PMC4008710)

**Table S1. Search Strategy for Randomized Controlled Trials Investigating the Effect of  
 Vitamin D Supplementation on Depressive Symptoms**

| Database                                                                      | Search Period                                             | Search                                                                                                                                                                                                                                                                                                                                                                                                                                |
|-------------------------------------------------------------------------------|-----------------------------------------------------------|---------------------------------------------------------------------------------------------------------------------------------------------------------------------------------------------------------------------------------------------------------------------------------------------------------------------------------------------------------------------------------------------------------------------------------------|
| MEDLINE<br>Ovid MEDLINE(R)<br>In-Process & Other<br><br>Non-Indexed Citations | 1946 to second<br>week of May<br>2013<br><br>June 1, 2012 | 1. exp depression/<br>2. exp depressive disorders/<br>3. depress\$.tw.<br>4. or/1-3<br>5. exp vitamin d/<br>6. exp Vitamin D Deficiency/<br>7. vitamin d.tw.<br>8. 25-hydroxyvitamin D.tw.<br>9. Cholecalciferol.tw.<br>10. Dihydrotachysterol.tw.<br>11. Ergosterol.tw.<br>12. or/5-11<br>13. 4 and 12                                                                                                                               |
| CINAHL                                                                        | 1982 to second<br>week of May<br>2013                     | S1 (MH "Depression+")<br>S2 TI depress* OR AB depress*<br>S3 S1 or S2<br>S4 (MH "Vitamin D+")<br>S5 (MH "Vitamin D Deficiency+")<br>S6 TI vitamin d OR AB vitamin d<br>S7 TI 25-hydroxyvitamin D OR AB 25-hydroxyvitamin D<br>S8 TI Cholecalciferol OR AB Cholecalciferol<br>S9 TI Dihydrotachysterol OR AB Dihydrotachysterol<br>S10 TI Ergosterol OR AB Ergosterol<br>S11 S4 or S5 or S6 or S7 or S8 or S9 or S10<br>S12 S3 and S11 |
| AMED                                                                          | 1985 to second<br>week of May<br>2013                     | 1. depression/<br>2. depress\$.tw.<br>3. 1 or 2<br>4. exp vitamin d/<br>5. vitamin d.tw.<br>6. 25-hydroxyvitamin D.tw.<br>7. Cholecalciferol.tw.<br>8. Dihydrotachysterol.tw.<br>9. Ergosterol.tw.<br>10. or/4-9<br>11. 3 and 10                                                                                                                                                                                                      |

*Continued on following page*

*Supplemental Table 1--Continued*

| <b>Database</b>      | <b>Search Period</b>                                                         | <b>Search</b>                                                                                                                                                                                                                                                                                                                                                                                                                                                                              |
|----------------------|------------------------------------------------------------------------------|--------------------------------------------------------------------------------------------------------------------------------------------------------------------------------------------------------------------------------------------------------------------------------------------------------------------------------------------------------------------------------------------------------------------------------------------------------------------------------------------|
| PsycInfo             | 1806 to second week of May 2013                                              | 1. exp major depression/<br>2. "depression (emotion)"/<br>3. depress\$.tw.<br>4. or/1-3<br>5. exp Vitamin Deficiency Disorders/<br>6. exp vitamins/<br>7. vitamin therapy/<br>8. vitamin d.tw.<br>9. 25-hydroxyvitamin D.tw.<br>10. Cholecalciferol.tw.<br>11. Dihydrotachysterol.tw.<br>12. Ergosterol.tw.<br>13. or/5-12<br>14. 4 and 13                                                                                                                                                 |
| Scopus               | Searched May 23, 2012 and weekly thereafter until May 15, 2013               | #1 TITLE-ABS_KEY(depress*)<br>#2 TITLE-ABS_KEY("vitamin d" OR "25-hydroxyvitamin D" OR Cholecalciferol OR Dihydrotachysterol OR Ergosterol)<br>#3 #1 AND #2                                                                                                                                                                                                                                                                                                                                |
| The Cochrane Library | All databases accessed June 1, 2012 and weekly thereafter until May 15, 2013 | #1 MeSH descriptor Depression explode all trees<br>#2 MeSH descriptor Depressive Disorder explode all trees<br>#3 depress*:ti,ab<br>#4 (#1 OR #2 OR #3)<br>#5 MeSH descriptor Vitamin D explode all trees<br>#6 MeSH descriptor Vitamin D Deficiency explode all trees<br>#7 "vitamin d":ti,ab<br>#8 "25-hydroxyvitamin D":ti,ab<br>#9 Cholecalciferol:ti,ab<br>#10 Dihydrotachysterol:ti,ab<br>#11 Ergosterol:ti,ab<br>#12 (#5 OR #6 OR #7 OR #8 OR #9 OR #10 OR #11)<br>#13 (#4 AND #12) |

**Table S2. Risk of Bias in Randomized Controlled Trials Investigating the Effect of Vitamin D Supplementation on Depressive Symptoms**

| <b>Study, Year (Reference)</b>      | <b>Random</b>              |                                  |                            | <b>Outcome</b>                   |                         |                                 |
|-------------------------------------|----------------------------|----------------------------------|----------------------------|----------------------------------|-------------------------|---------------------------------|
|                                     | <b>Sequence Generation</b> | <b>Randomization Concealment</b> | <b>Participants Masked</b> | <b>Research Personnel Masked</b> | <b>Assessors Masked</b> | <b>Intent-to-Treat Analyses</b> |
| Hogie-Lorenzen, 2003 (15)           | Unclear                    | Unclear                          | High                       | High                             | High                    | High                            |
| Jorde et al, 2008 (14)              | Unclear                    | Unclear                          | Low                        | Unclear                          | Low                     | Low                             |
| Dean et al, 2011 (28)               | Low                        | Low                              | Low                        | Low                              | Low                     | Low                             |
| Bertone-Johnson et al, 2012 (27)    | Low                        | Unclear                          | Low                        | Unclear                          | Low                     | Low                             |
| Kjaergaard et al, 2012 (29)         | Low                        | Low                              | Low                        | Low                              | Low                     | Low                             |
| Khoraminy et al, 2012 (26)          | Unclear                    | Unclear                          | Low                        | Unclear                          | Low                     | High                            |
| Mozaffari-Khosravi et al, 2013 (18) | Low                        | Unclear                          | High                       | High                             | High                    | High                            |

**Figure S1. Summary of Evidence Search and Selection**

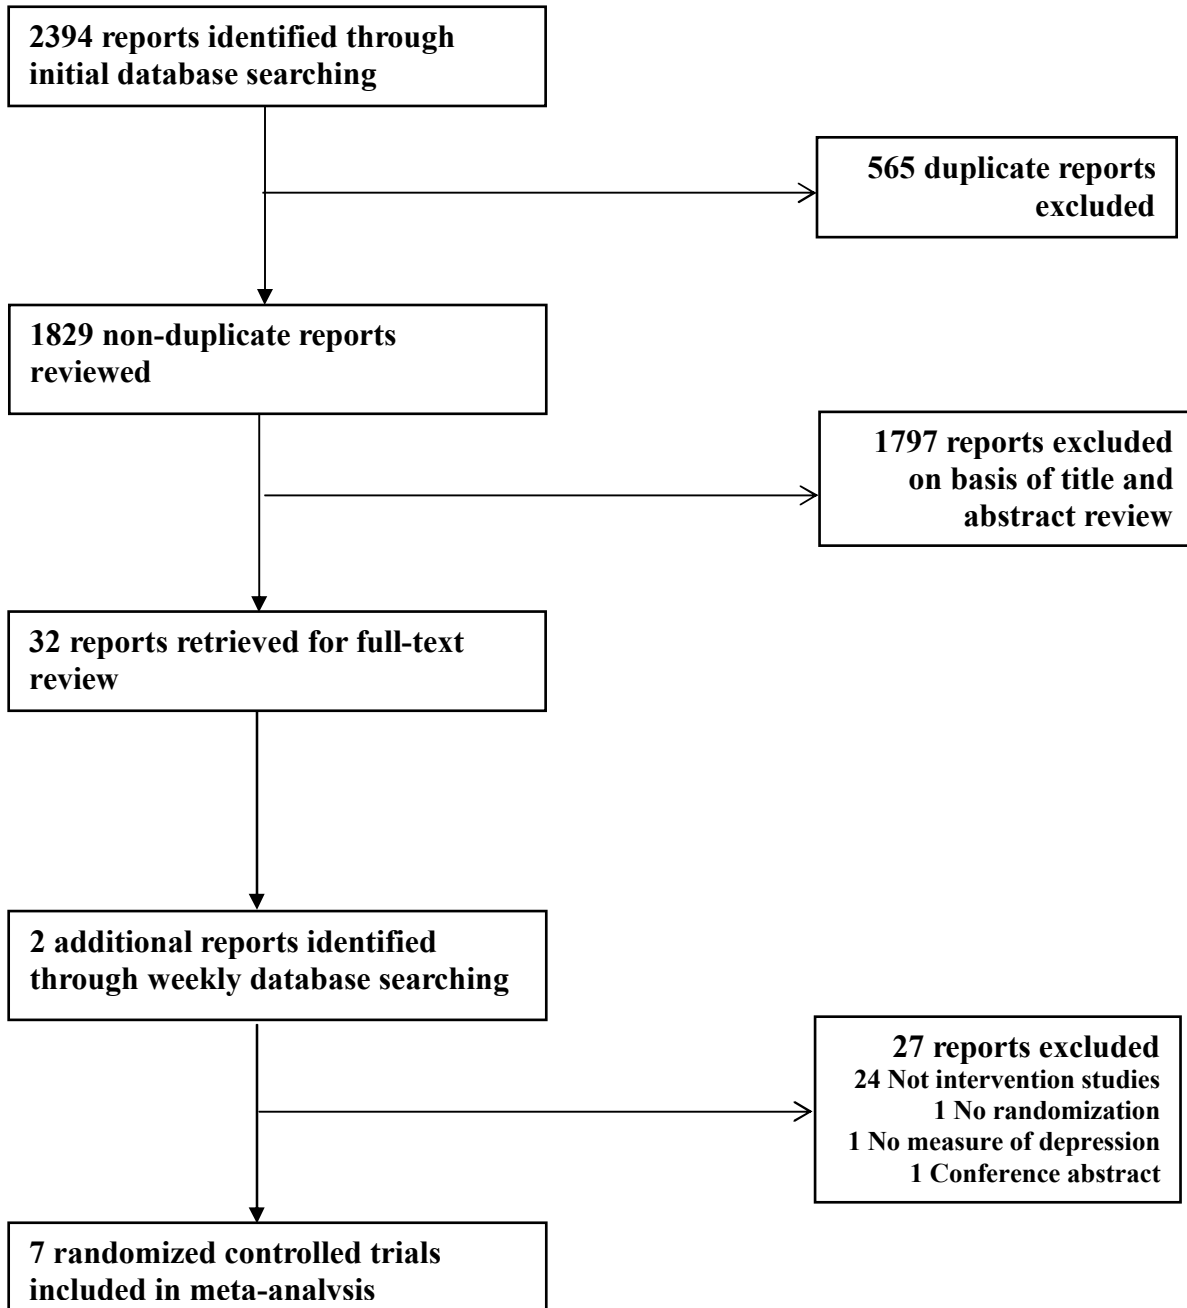

Supplement: NIHMS557154-supplement-01.pdf [file NIHMS557154-supplement-01.pdf]
